# Supplementary material for: Pineal progenitors originate from a non-neural territory limited by FGF signalling
Source: PubMed Central journal article supplement (PMC7375831; doi:10.1242/dev.171405), 2019-11-21
Supplement: develop-146-171405-s1.pdf [file develop-146-171405-s1.pdf]

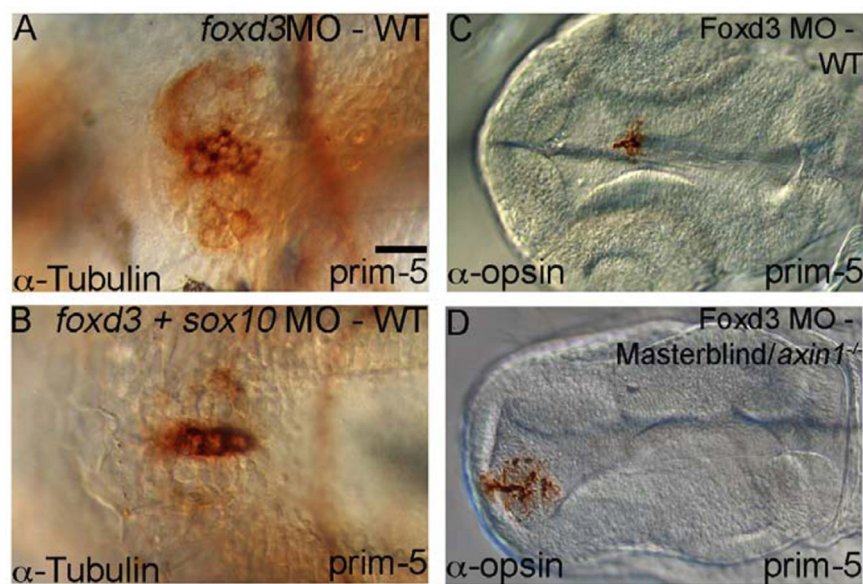

**Fig. S1. Neural crest identity is not required for pineal organ formation and the pineal anlage is expanded in embryos with excessive Wnt signalling.**

Dorsal views (anterior points left) of zebrafish embryos at prim-5 stage stained immunohistochemically for the neural differentiation marker  $\alpha$ -Tubulin (A, B) and the photoreceptor marker  $\alpha$ -Opsin (C, D). Neither MO-mediated knockdown of *foxd3* alone (A, C), nor of *foxd3* and *sox10* together (B) affects pineal organ formation. (D) The pineal anlage is anteriorly expanded in *mbl* mutants. Scale bar in A is 50  $\mu$ m.

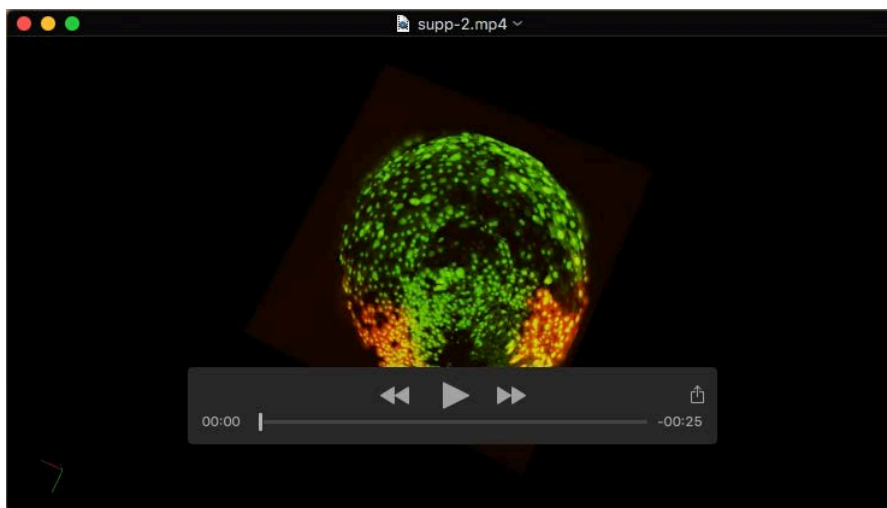

**Movie 1. Non-neural ectoderm contributes to the pineal organ.** Light-sheet microscopy movie of zebrafish embryo (dorsal view, anterior to the top) expressing Kaede from tail bud to 22-somite stage (T step: 6 min). Photo-converted cells located in the non-neural ectoderm end up in the pineal organ. Also see Fig. 2G-J.

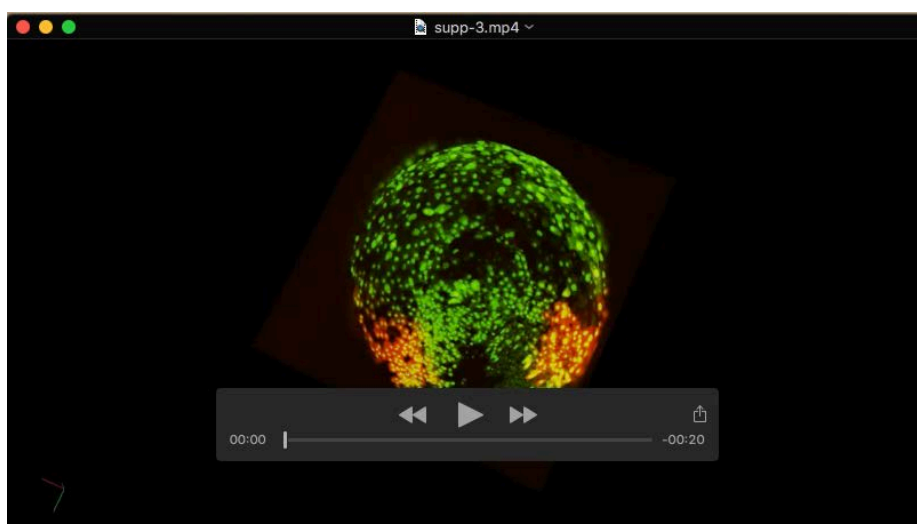

**Movie 2. Tracks of non-neural ectodermal cells ending up in the pineal organ.** Tracks of three converted cells located in the non-neural ectoderm at tail bud stage that end up in the pineal organ at 30 hpf. Also see Fig. 2G-K.
